# Supplementary material for: Gold nanorod-seeded synthesis of Au@Ag/Au nanospheres with broad and intense near-infrared absorption for photothermal cancer therapy
Source: Royal Society of Chemistry journal article supplement (doi:10.1039/c4tb00202d), 2014-01-01
Supplement: c4tb00202d1.pdf [file c4tb00202d1.pdf]

*Supplementary Information*

**Gold nanorod-seeded synthesis of Au@Ag/Au  
nanospheres with broad and intense near-infrared  
absorption for photothermal cancer therapy**

**Xiaosheng Ye, Hui Shi,<sup>‡</sup> Xiaoxiao He, Kemin Wang,\* Duo Li and Pengchao Qiu**

State Key Laboratory of Chemo/Biosensing and Chemometrics, College of Chemistry and Chemical  
Engineering, Institute of Biology, Hunan University, Key Laboratory for Bio-Nanotechnology and  
Molecular Engineering of Hunan Province, Changsha 410082, China.

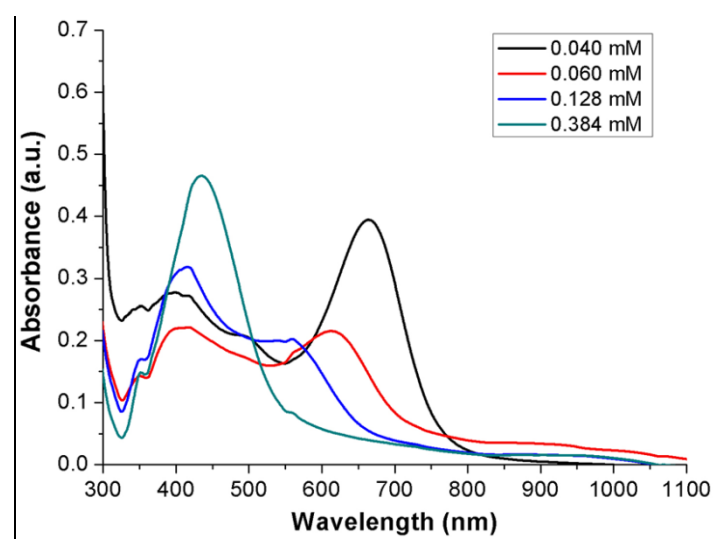

**Fig. S1** UV-vis absorption spectra of Au@Ag NPs prepared using different concentrations of AgNO<sub>3</sub>.

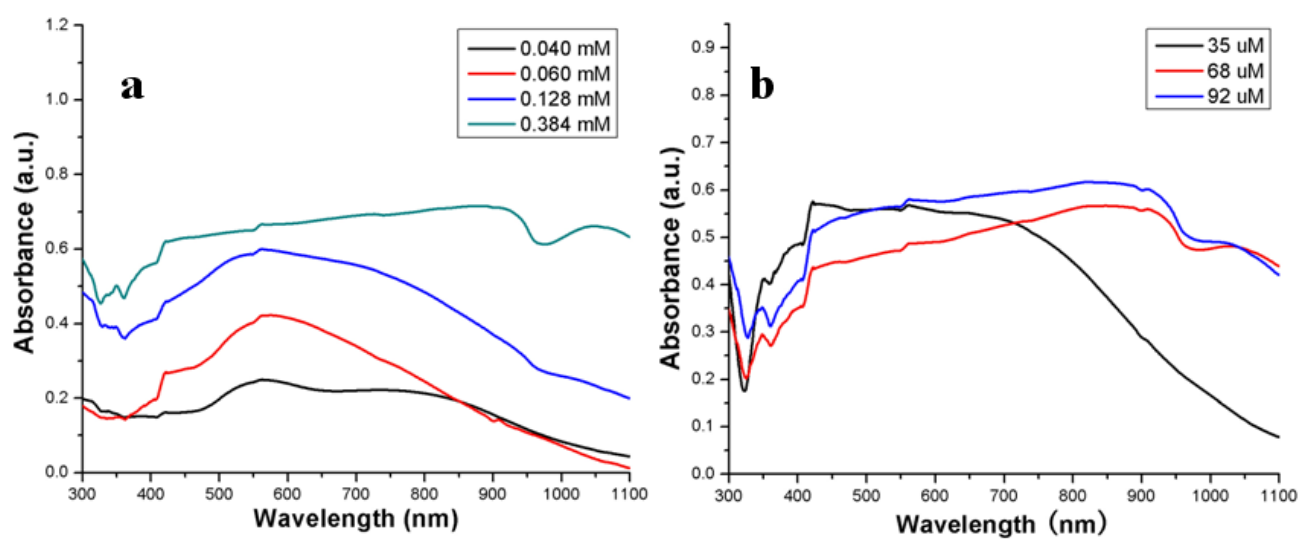

**Fig. S2** UV-vis absorption spectra of Au@Ag/Au NPs. a) NPs prepared through the reaction of Au NRs with different concentrations of  $\text{AgNO}_3$  in the growth solution and then reacting with 68  $\mu\text{M}$   $\text{HAuCl}_4$ ; b) NPs prepared through the reaction of Au NRs with 0.384 mM  $\text{AgNO}_3$  in the growth solution and then reacting with different concentrations of  $\text{HAuCl}_4$ .

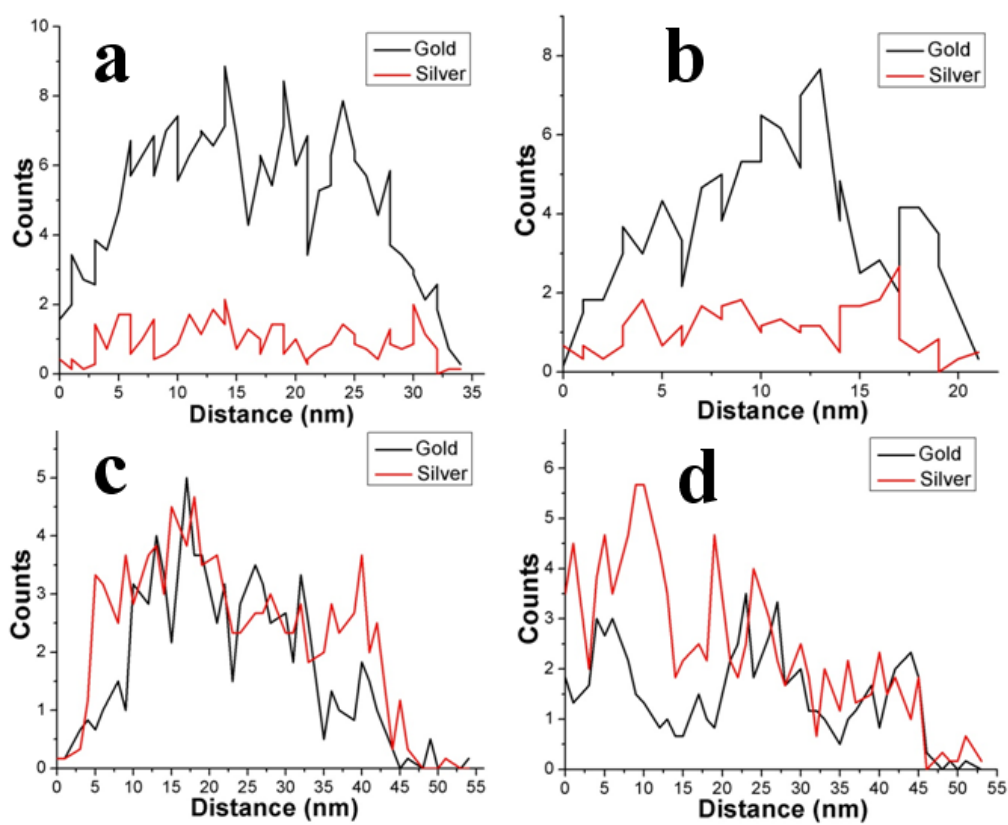

**Fig. S3** Cross-sectional compositional profiles of (a, c) line 1 and (b, d) line 2 in (a, b) Fig. 2b and (c, d) Fig. 2f, respectively.

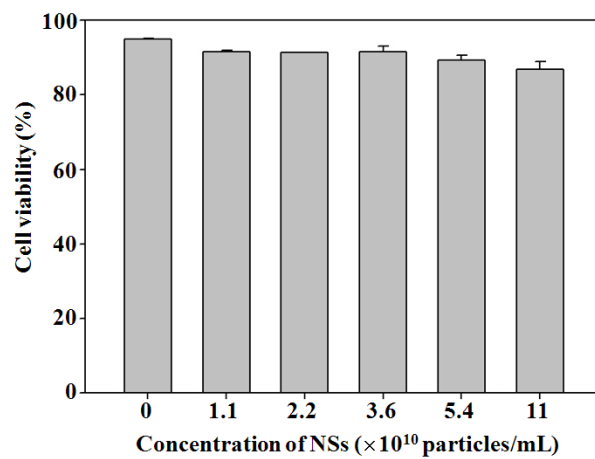

**Fig. S4** Viability tests of A549 cells treated by different concentrations of Au@Ag/Au NSs using a PI-based dead cell staining method.

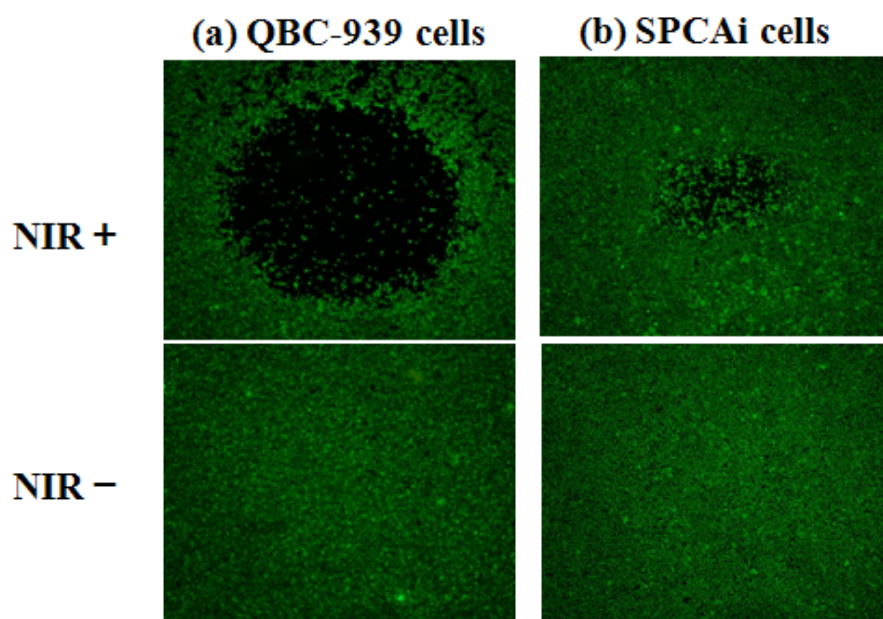

**Fig. S5** Different cancer cells were firstly incubated with Au@Ag/Au NSs ( $2.2 \times 10^{10}$  particles/mL) for 6 h and then treated by NIR irradiation for 5 min using a 980 nm laser at 26.5 mW. The cell viability was assessed using the calcein-AM live cell staining method and the green fluorescence indicates living cells.
